# Supplementary material
Source: PubMed Central journal article supplement (PMC7529934)
Supplement: NIHMS1610916-supplement-1.pdf [file NIHMS1610916-supplement-1.pdf]

## Animal Table

| Reference                      | Experimental Design         | Species | Sample Size   | Age                  | Inhaled Nicotine Product                         | Nicotine content                    | Outcome measures                                                            | Biochemical Analyses of Nicotine   |
|--------------------------------|-----------------------------|---------|---------------|----------------------|--------------------------------------------------|-------------------------------------|-----------------------------------------------------------------------------|------------------------------------|
| (Shao et al., 2019)            | Passive whole body exposure | mice    | 5 per group   | Adult (8-12 weeks)   | bluCig PLUS e-cig                                | 2.4%                                | Food intake, locomotion, body weight                                        | plasma nicotine/cotinine           |
| (Javadipaydar et al., 2019)    | Passive exposure            | rats    | 8             | Adult (10-11 weeks)  | e-cig cartridges (protank 3 atomizer, MT32 coil) | 0, 1, 10, 30 mg/mL                  | body temperature, locomotor activity                                        | Plasma nicotine and cotinine       |
| (Shao et al., 2017)            | passive nose-only exposure  | rats    | n/a           | adult                | 3-jet Collison nebulizer                         | 1%                                  | Uterine artery blood flow, arterial blood pressure, ECG                     | plasma nicotine/cotinine           |
| (Ahmad et al., 2019)           | Passive nose only exposure  | rats    | 6             | Adult (275-300 g)    | Bioaerosol Nebulizer Generator                   | 0/5/10%                             | Toxicity markers                                                            | n/a                                |
| (Nabavizadeh et al., 2018)     | Passive nose-only           | rats    | 60            | Adult 8-10 weeks     | IQOS                                             | aerosol particle phase: 0.67 ± 0.02 | Arterial flow-mediated dilation,                                            | serum nicotine/cotinine            |
| (Titz et al., 2018)            | Passive nose-only exposure  | rats    | 83            | Adult, 6-8 weeks old | CHTP1.2,                                         | 15, 23, 50 ug/L                     | System toxicology results                                                   | n/a                                |
| (Lefever et al., 2017)         | Passive exposure            | mice    | 8/sex/group   | adult                | modified e-cig (iStick 30W CE5-S tank)           | 0, 12, 24, 30 mg/ml                 | Hypothermia, locomotor suppression                                          | Plasma and brain nicotine/cotinine |
| (Espinoza-derout et al., 2019) | passive exposure            | mice    | 5 per group   | Adult (8 weeks)      | e-cigs, bluCig PLUS                              | 0%, 2.4%                            | Echo, Ventricular transcriptomic analysis, Transmission electron microscopy | plasma cotinine                    |
| (Orzabal et al., 2019)         | passive exposure            | rats    | 37            | adult                | nicotine aerosol                                 | 50, 100 mg/mL                       | maternal and fetal vascular hemodynamics, growth deficits                   | n/a                                |
| (Shi et al., 2019)             | whole body exposure         | mice    | 3-5 per group | Adult (2-3 months)   | nicotine aerosol                                 | 24 mg/ml                            | Echo                                                                        | plasma cotinine                    |
| (Wetendorf et al., 2019)       | whole body passive exposure | mice    | 5 per group   | Adult                | Joyetech eVic VTC Mini with a 0.15-V e-cig       | 24mg/ml                             | embryo implantation, RNA microarray, weight                                 | n/a                                |

## Animal Table

|                                 |                             |      |                |                    |                                                                               |                       |                                                                            |                                 |
|---------------------------------|-----------------------------|------|----------------|--------------------|-------------------------------------------------------------------------------|-----------------------|----------------------------------------------------------------------------|---------------------------------|
| (Laube et al., 2017)            | whole-body passive exposure | mice | 45             | Adult (10.5 weeks) | Joytech 510-T@ e-cig                                                          | 0,2,4%                | mucociliary clearance in lungs                                             | serum cotinine                  |
| (Madison et al., 2019)          | passive exposure            | mice | n/a            | Adult (two months) | Zeus e-cig (5 V, 1300-mAh capacity, and cartomizer with a 2.5- $\Omega$ coil) | 33mg/ml               | inflammation emphysema                                                     | n/a                             |
| (Crotty Alexander et al., 2018) | nose only exposure          | mice | 6              | Adult (6-8 weeks)  | e-cig (1.8 $\Omega$ ) lithium ion battery (3.4 V)                             | 24mg/ml               | HR, BP, inflammatory markers                                               | serum cotinine                  |
| (Alasmar i et al., 2017)        | passive nose only exposure  | mice | 4-5 per group  | Adult (6-week-old) | nicotine aerosol                                                              | 24 mg/mL              | $\alpha$ -7 anchor, GLT-1, xCT, GLAST and GAPDH in FC, STR and HIP changes | brain nicotine/cotinine         |
| (Lee et al., 2019)              | passive nose-only exposure  | mice | 3-15 per group | Adult (10 weeks)   | MarkTenVR e-cig                                                               | 4%                    | terminal organ weights, lung transcriptomics and proteomics                | n/a                             |
| (Wang et al., 2019)             | passive exposure            | mice | 6 per group    | Adult              | e Joytech eVIC VTC mini e-cig [atomizer/coil (0.15 $\Omega$ )]                | 25 mg/mL              | inflammatory markers                                                       | n/a                             |
| (Alasmar i et al., 2019)        | passive exposure            | mice | 5 per group    | Adult (6-8 weeks)  | e-cig cartomizers (tanks; 2.4 $\Omega$ )                                      | 24 mg/ml              | neurotransmitters in frontal cortex and striatum                           | n/a                             |
| (Lefever et al., 2019)          | Passive exposure            | mice | 6-8 per sex    | adult              | modified e-cig (iStick 30W CE5-S tank)                                        | 12,18,24, 30mg/ml     | Nicotine discrimination                                                    | plasma and brain nicotine       |
| (Montana ri et al., 2019)       | passive exposure            | rats | 6 per group    | Adult (~250 g)     | e-cig (Protank II Atomizer, MT32 coil operating at 2.2 $\Omega$ )             | 20, 40, 80 mg/mL      | somatic withdrawal signs                                                   | plasma nicotine/cotinine        |
| (Phillips et al., 2018)         | Passive nose-only exposure  | rats | 284            | Adult (6-8 weeks)  | CHTP1.2                                                                       | 15,23, 50 $\mu$ g /L, | nasal epithelium changes                                                   | Plasma nicotine/cotinine        |
| (Phillips et al., 2017)         | Passive nose-only exposure  | rats | 208            | Adult (6 weeks)    | 6-jet Collison nebulizer                                                      | .023mg/L              | toxicological endpoints                                                    | plasma nicotine/cotinine levels |
| (Qasim et al., 2018)            | Passive whole body exposure | mice | 5-8 per group  | Adult (10 weeks)   | e-cig: SMOK TFV4 Mini Tanks (5 V, 0.4 $\Omega$ )                              | 18mg/ml               | Thrombotic events                                                          | Plasma cotinine                 |
| (Ha et al., 2019)               | Passive whole body exposure | mice | 24             | n/a                | Nicotine vapor                                                                | n/a                   | Larynx inflammation                                                        | n/a                             |

## Animal Table

|                         |                             |      |                |                     |                                   |          |                                                            |                          |
|-------------------------|-----------------------------|------|----------------|---------------------|-----------------------------------|----------|------------------------------------------------------------|--------------------------|
| (Olfert et al., 2018)   | Passive whole body exposure | mice | 45             | Adult (13-14 weeks) | tank e-cig (eGrip OLED, Joyetech) | 18mg/ml  | aortic arterial stiffness,                                 | Urine cotinine           |
| (Phillips et al., 2019) | passive whole-body exposure | mice | 882            | Adult (8-10 weeks)  | CHTP 1.2, THS 2.2,                | 28 µg/L  | lung function, lung volume, inflammation, oxidative stress | plasma nicotine/cotinine |
| (Glynos et al., 2018)   | passive whole-body exposure | mice | 5-10 per group | Adult (8-12 weeks)  | e-cig vapors                      | 18 mg/ml | Lung inflammation; lung mechanics                          | n/a                      |

e-cig=e-cigarette; ECG=electrocardiogram; CHTP 1.2=carbon heated tobacco product 1.2; THS 2.2=tobacco heating system 2.2;  $\alpha 7$ = $\alpha 7$  nicotinic acetylcholine receptor; GLT-1=glutamate transporter 1; xCT=cystine–glutamate antiporter; GLAST=glutamate and aspartate transporter; GAPDH=Glyceraldehyde 3-phosphate dehydrogenase; FC=frontal cortex; STR=striatum; HIP=hippocampus; HR=heart rate; BP=blood pressure; echo=echocardiography;  $\Omega$ =ohms; V=volts

## Citations

- Ahmad, X.S., Zafar, I., Mariappan, N., Husain, M., Wei, C., Vetal, N., Eltoum, I.A., Ahmad, X.A., Ia, E., Acute, A.A., 2019. Acute pulmonary effects of aerosolized nicotine. *Am J Physiol Lung Cell Mol Physiol* 316, 94–104. <https://doi.org/10.1152/ajplung.00564.2017>
- Alasmari, F., Crotty Alexander, L.E., Hammad, A.M., Bojanowski, C.M., Moshensky, A., Sari, Y., 2019. Effects of Chronic Inhalation of Electronic Cigarette Vapor Containing Nicotine on Neurotransmitters in the Frontal Cortex and Striatum of C57BL / 6 Mice. *Front. Pharmacol.* 10, 1–12. <https://doi.org/10.3389/fphar.2019.00885>
- Alasmari, F., Crotty Alexander, L.E., Nelson, J.A., Schiefer, I.T., Breen, E., Drummond, C.A., Sari, Y., 2017. Effects of chronic inhalation of electronic cigarettes containing nicotine on glial glutamate transporters and  $\alpha$ -7 nicotinic acetylcholine receptor in female CD-1 mice. *Prog. Neuro-Psychopharmacology Biol. Psychiatry* 77, 1–8. <https://doi.org/10.1016/j.pnpbp.2017.03.017>
- Crotty Alexander, L., Drummond, C.A., Hepokoski, M., Mathew, D., Moshensky, A., Willeford, A., Das, S., Singh, P., Yong, Z., Lee, J.H., Vega, K., Du, A., Shin, J., Javier, C., Tian, J., Brown, J.H., Breen, E.C., 2018. Chronic inhalation of e-cigarette vapor containing nicotine disrupts airway barrier function and induces systemic inflammation and multiorgan fibrosis in mice. *Am J Physiol Regul Integr Comp Physiol.* 314, 834–847. <https://doi.org/10.1152/ajpregu.00270.2017>
- Espinoza-derout, X.J., Hasan, K.M., Shao, X.X.M., Jordan, M.C., Sims, Carl, Lee, D.L., Sinha, Satyesh, Simmons, Zena, Mtume, Norma, Liu, Yanjun, Roos, K.P., Sinha-hikim, A.P., Friedman, T.C., Km, H., Xm, S., Mc, J., Sims, C, Dl, L., Sinha, S, Simmons, Z, Mtume, N, Liu, Y, Kp, R., 2019. Chronic intermittent electronic cigarette exposure induces cardiac dysfunction and atherosclerosis in apolipoprotein-E knockout mice. *Am. J. Physiol. Heart Circ. Physiol.* 317, H445–H459. <https://doi.org/10.1152/ajpheart.00738.2018>
- Glynos, C., Bibli, S., Katsaounou, P., Pavlidou, A., Magkou, C., Karavana, V., Topouzis, S., Kalomenidis, I., Zakyntinos, S., Papapetropoulos, A., 2018. Comparison of the effects of e-cigarette vapor with

## Animal Table

- cigarette smoke on lung function and inflammation in mice. *Am J Physiol Lung Cell Mol Physiol* 315, 662–672. <https://doi.org/10.1152/ajplung.00389.2017>
- Ha, T.-A.N., Madison, M.C., Kheradmand, F., Altman, K.W., 2019. Laryngeal inflammatory response to smoke and vape in a murine model. *Am J Otolaryngol* 40, 89–92. <https://doi.org/10.1016/j.amjoto.2018.10.001>
- Javadi-paydar, M., Kerr, T.M., Harvey, E.L., Cole, M., Taffe, M.A., 2019. Effects of nicotine and THC vapor inhalation administered by an electronic nicotine delivery system ( ENDS ) in male rats. *Drug Alcohol Depend.* 198, 54–62. <https://doi.org/10.1016/j.drugalcdep.2019.01.027>
- Laube, B.L., Afshar-mohajer, N., Koehler, K., Chen, G., Lazarus, P., Collaco, J.M., Mcgrath-morrow, S.A., 2017. Acute and chronic in vivo effects of exposure to nicotine and propylene glycol from an E-cigarette on mucociliary clearance in a murine model. *Inhal Toxicol* 29, 197–205. <https://doi.org/10.1080/08958378.2017.1336585>.Acute
- Lee, K.M., Hoeng, J., Harbo, S., Kogel, U., Gardner, W., Oldham, M., Benson, E., Talikka, M., Kondylis, A., Titz, B., Ansari, S., Trivedi, K., Guedj, E., Ivanov, N. V, Vanscheeuwijck, P., Peitsch, M.C., Lee, K.M., Hoeng, J., Harbo, S., Kogel, U., Gardner, W., Oldham, M., Benson, E., Talikka, M., Kondylis, A., Martin, F., Titz, B., Trivedi, K., Guedj, E., Elamin, A., Ivanov, N. V, Vanscheeuwijck, P., Peitsch, M.C., Jr, W.J.M., 2019. Biological changes in C57BL / 6 mice following 3 weeks of inhalation exposure to cigarette smoke or e-vapor aerosols. *Inhal. Toxicol.* 30, 553–567. <https://doi.org/10.1080/08958378.2019.1576807>
- Lefever, T.W., Lee, Y.O.K., Kovach, A.L., Silinski, M.A.R., Marusich, J.A., Thomas, B.F., Wiley, J.L., 2017. Delivery of nicotine aerosol to mice via a modified electronic cigarette device. *Drug Alcohol Depend.* 172, 80–87. <https://doi.org/10.1016/j.drugalcdep.2016.12.004>.Delivery
- Lefever, T.W., Thomas, B.F., Kovach, A.L., Snyder, R.W., Wiley, J.L., 2019. Route of administration effects on nicotine discrimination in female and male mice. *Drug Alcohol Depend.* 204, 1–8. <https://doi.org/10.1016/j.drugalcdep.2019.06.007>
- Madison, M.C., Landers, C.T., Gu, B., Chang, C., Tung, H., You, R., Hong, M.J., Baghaei, N., Song, L., Porter, P., Pulturi, N., Salas, R., Gilbert, B., Levental, I., Campen, M., Corry, D., Kheradmand, F., 2019. Electronic cigarettes disrupt lung lipid homeostasis and innate immunity independent of nicotine. *J. Clin. Invest.*
- Montanari, C., Kelley, L.K., Kerr, T.M., Cole, M., Gilpin, N.W., 2019. Nicotine e-cigarette vapor inhalation effects on nicotine & cotinine plasma levels and somatic withdrawal signs in adult male Wistar rats. *Psychopharmacology (Berl)*.
- Nabavizadeh, P., Liu, J., Havel, C.M., Ibrahim, S., Derakhshandeh, R., Iii, P.J., Springer, M.L., 2018. Vascular endothelial function is impaired by aerosol from a single IQOS HeatStick to the same extent as by cigarette smoke. *Tob Control* 27, s13–s19. <https://doi.org/10.1136/tobaccocontrol-2018-054325>
- Olfert, I.M., Devallance, E., Hoskinson, H., Branyan, K.W., Clayton, S., Pitzer, C.R., Sullivan, D.P., Breit, M.J., Wu, Z., Klinkhachorn, P., Mandler, W.K., Erdreich, B.H., Ducatman, B.S., Bryner, R.W., Dasgupta, P., Chantler, P.D., 2018. Chronic exposure to electronic cigarettes results in impaired cardiovascular function in mice. *J. Appl Physiol* 124, 573–582. <https://doi.org/10.1152/jappphysiol.00713.2017>

## Animal Table

- Orzabal, M.R., Lunde-young, E.R., Ramirez, J.I., Howe, S.Y.F., Naik, V.D., Lee, J., Heaps, C.L., Threadgill, D.W., Ramadoss, J., 2019. Chronic exposure to e-cig aerosols during early development causes vascular dysfunction and offspring growth deficits. *Transl. Res.* 207, 70–82. <https://doi.org/10.1016/j.trsl.2019.01.001>
- Phillips, B., Szostak, J., Titz, B., Schlage, W.K., Guedj, E., Leroy, P., Vuillaume, G., Martin, F., Buettner, A., Elamin, A., Sewer, A., Sierro, N., Amin, M., Schneider, T., Ivanov, N. V, Teng, C., Keong, C., Ting, W., Shan, Y., Vanscheeuwijck, P., Peitsch, M.C., Hoeng, J., 2019. A six-month systems toxicology inhalation / cessation study in ApoE – / – mice to investigate cardiovascular and respiratory exposure effects of modified risk tobacco products , CHTP 1 . 2 and THS 2 . 2 , compared with conventional cigarettes. *Food Chem. Toxicol.* 126, 113–141. <https://doi.org/10.1016/j.fct.2019.02.008>
- Phillips, B., Titz, B., Kogel, U., Sharma, D., Leroy, P., Xiang, Y., Vuillaume, G., Lebrun, S., Sciuscio, D., Ho, J., Nury, C., Guedj, E., Elamin, A., Esposito, M., Krishnan, S., Schlage, W.K., Veljkovic, E., Ivanov, N. V, Martin, F., Peitsch, M.C., Hoeng, J., Vanscheeuwijck, P., 2017. Toxicity of the main electronic cigarette components, propylene glycol, glycerin, and nicotine , in Sprague-Dawley rats in a 90-day OECD inhalation study complemented by molecular endpoints. *Food Chem. Toxicol.* 109, 315–332. <https://doi.org/10.1016/j.fct.2017.09.001>
- Phillips, B.W., Schlage, W.K., Titz, B., Kogel, U., Sciuscio, D., Martin, F., Leroy, P., Vuillaume, G., Krishnan, S., Lee, T., Veljkovic, E., Elamin, A., Merg, C., Ivanov, N. V, Peitsch, M.C., Hoeng, J., Vanscheeuwijck, P., 2018. A 90-day OECD TG 413 rat inhalation study with systems toxicology endpoints demonstrates reduced exposure effects of the aerosol from the carbon heated tobacco product version 1 . 2 ( CHTP1 . 2 ) compared with cigarette smoke . I . Inhalation exposure , c. *Food Chem. Toxicol.* 116, 388–413. <https://doi.org/10.1016/j.fct.2018.04.015>
- Qasim, H., Karim, Z.A., Silva-Espinoza, J.C., Khasawneh, F.T., Rivera, J.O., Ellis, C.C., Bauer, S.L., Almeida, I.C., Alshbool, F.Z., 2018. Short-Term E-Cigarette Exposure Increases the Risk of Thrombogenesis and Enhances Platelet Function in Mice. *J. Am. Heart Assoc.* 7, 1–15. <https://doi.org/10.1161/JAHA.118.009264>
- Shao, X.M., López-Valdés, H.E., Liang, J., Feldman, J.L., 2017. Inhaled nicotine equivalent to cigarette smoking disrupts systemic and uterine hemodynamics and induces cardiac arrhythmia in pregnant rats. *Sci. Rep.* 1, 1–14. <https://doi.org/10.1038/s41598-017-17301-5>
- Shao, X.M., Lopez, B., Nathan, D., Wilson, J., Bankole, E., Tumoyan, H., Munoz, A., Espinoza-Derout, J., Hasan, K.M., Chang, S., Du, C., Sinha-hikim, A.P., Lutfy, K., Friedman, T.C., 2019. A mouse model for chronic intermittent electronic cigarette exposure exhibits nicotine pharmacokinetics resembling human vapers. *J. Neurosci. Methods* 326, 1–7. <https://doi.org/10.1016/j.jneumeth.2019.108376>
- Shi, H., Fan, X., Horton, A., Haller, S.T., Kennedy, D.J., Schiefer, I.T., Dworkin, L., Cooper, C.J., Tian, J., 2019. The Effect of Electronic-Cigarette Vaping on Cardiac Function and Angiogenesis in Mice. *Sci. Rep.* 9, 1–9. <https://doi.org/10.1038/s41598-019-40847-5>
- Titz, B., Kogel, U., Martin, F., Schlage, W.K., Xiang, Y., Nury, C., Dijon, S., Baumer, K., Peric, D., Bornand, D., Dulize, R., Phillips, B., Leroy, P., Vuillaume, G., Lebrun, S., Elamin, A., Guedj, E., Trivedi, K., Ivanov, N. V, Vanscheeuwijck, P., Peitsch, M.C., Hoeng, J., 2018. A 90-day OECD TG 413 rat inhalation study with systems toxicology endpoints demonstrates reduced exposure effects of the aerosol from the carbon heated tobacco product version 1 . 2 ( CHTP1 . 2 ) compared with cigarette smoke . II . Systems toxicology ass. *Food Chem. Toxicol.* 115, 284–301.

Animal Table

<https://doi.org/10.1016/j.fct.2018.02.058>

Wang, Q., Khan, N.A., Muthumalage, T., Lawyer, G.R., Mcdonough, S.R., Chuang, T.-D., Gong, M., Sundar, I.K., Rehan, V.K., Rahman, I., 2019. Dysregulated repair and inflammatory responses by e - cigarette - derived inhaled nicotine and humectant propylene glycol in a sex - dependent manner in mouse lung. *Faseb bioadvances* 1, 609–623. <https://doi.org/10.1096/fba.2019-00048>

Wetendorf, M., Randall, L.T., Lemma, M.T., Hurr, S.H., Pawlak, J.B., Tarran, R., Doerschuk, C.M., Caron, K.M., 2019. E-Cigarette Exposure Delays Implantation and Causes Reduced Weight Gain in Female Offspring Exposed In Utero. *J. Endocr. Soc.* 3, 1907–1916. <https://doi.org/10.1210/js.2019-00216>

Journal Pre-proof

## Human Table

| Reference                 | Experimental Design                       | Subjects                                                                                                                                                                  | Sample Size | Age (Years M(SD)) | Inhaled Nicotine Product                                        | Nicotine content                       | Flavors                                  | Outcome measures                                                                           | Biochemical Analyses of Nicotine             |
|---------------------------|-------------------------------------------|---------------------------------------------------------------------------------------------------------------------------------------------------------------------------|-------------|-------------------|-----------------------------------------------------------------|----------------------------------------|------------------------------------------|--------------------------------------------------------------------------------------------|----------------------------------------------|
| (Staudt et al., 2018)     | directed e-cig puffing session            | Self-reported never-smokers                                                                                                                                               | 10          | 40.2 ± 9.7        | Blu brand e-cig                                                 | n/a                                    | n/a                                      | endothelial microparticles, transcriptome of small airway epithelium, alveolar macrophages | n/a                                          |
| (Caponnetto et al., 2018) | directed e-cig puffing session            | smoking ≥10 CPD for at least 5 years                                                                                                                                      | 12          | 28.6              | Heated tobacco products (iQOS, GLO)                             | n/a                                    | n/a                                      | Carbon monoxide                                                                            | n/a                                          |
| (Leventhal et al., 2019)  | directed e-cig puffing session            | current e-cig user (>1 day/week for >1 month), use e-cigs with nicotine                                                                                                   | 100         | 25.4 (4.4)        | Joyetech Delta 23 Atomizer tank with eVic Supreme battery e-cig | 6 mg/mL, 0 mg/mL                       | 9 flavors; 5 Fruit, 2 menthol, 2 tobacco | Subjective effects                                                                         | n/a                                          |
| (Devito et al., 2019)     | directed e-cig puffing and ad-lib session | ≥5 CPD for past year; lifetime e-cig use                                                                                                                                  | 32          | 32.5 (7.8)        | eVic Supreme e-cigs (Joyetech) (9W)                             | 0 mg/mL, 24 mg/mL                      | unflavored, menthol, fruit-flavored      | Subjective effects, number of puffs                                                        | plasma nicotine, cotinine, 3-hydroxycotinine |
| (St. Helen et al., 2017)  | Directed e-cig puffing and ad-lib session | e-cig users (used at least 25 days for 3 months) or dual users (e-cig and cig users who smoked <5 CPD)                                                                    | 14          | 32.3 (13.8)       | KangerTech mini ProTank 3 e-cig                                 | 19.9mg/mL, 19.3 mg/mL, 7.4 ± 3.4 mg/mL | strawberry, tobacco, users' own          | subjective effects HR, pH                                                                  | plasma nicotine                              |
| (Spindle et al., 2018)    | directed e-cig puffing sessions           | smoke <5 CPD, use ≥ 1 mL ECIG liquid daily for ≥ 3 months                                                                                                                 | 30          | 26.9 (7.1)        | eGO' battery with dual-coil, 510 cartomizer e-cig               | 18 mg/ml                               | tobacco                                  | subjective effects, HR, puff topography                                                    | plasma nicotine                              |
| (Hiler et al., 2017)      | directed e-cig puffing sessions           | e-cig experienced users: e-cig use for ≥ 3 months, ≥ 1 ml e-cig solution daily currently smoking ≤5 CPD. E-cig naïve cigarette smokers: ≥ 10 CPD, < 5 e-cig uses lifetime | 64          | 30.6 (9.1)        | 3.3 V eGo battery with 1.5 Ω cartomizer e-cig                   | 0, 8, 18, or 36 mg/ml                  | Tobacco or menthol                       | puff topography, Subjective effects, HR                                                    | plasma nicotine                              |

## Human Table

|                           |                                           |                                                                        |    |             |                                                                                                           |                                                        |                                                 |                                                                         |                                                 |
|---------------------------|-------------------------------------------|------------------------------------------------------------------------|----|-------------|-----------------------------------------------------------------------------------------------------------|--------------------------------------------------------|-------------------------------------------------|-------------------------------------------------------------------------|-------------------------------------------------|
| (Pullicin et al., 2019)   | directed e-cig puffing session            | e-cig use with nicotine for $\geq 1$ month                             | 19 | 24.5        | V2 Ex Blank Cartridge and a V2 Standard 79-mm E-cig Battery (4.2 V)                                       | 0,6,12mg/ml                                            | cherry flavor (4.7% or 9.3%)                    | subjective effects                                                      | n/a                                             |
| (Voos et al., 2019b)      | directed e-cig puffing and ad-lib session | smoked $\geq 5$ CPD                                                    | 18 | 44.1(7.0)   | SuperCig Automatic eGo 510 Battery 910mAh (4.1V, 3.0 $\Omega$ )                                           | 24mg/ml                                                | cherry, tobacco, espresso, menthol, and vanilla | puffing topography, subjective effects                                  | plasma nicotine                                 |
| (Voos et al., 2019a)      | directed e-cig puffing and ad-lib session | smoked $\geq 10$ CPD                                                   | 18 | 41.3(9.7)   | disposable; rechargeable; eGO; mod; e-Cigar; and e-Pipe                                                   | 11.7mg/ml, 19.4mg/ml, 29.9mg/ml, 15.5 mg/ml, 29.9mg/ml | tobacco                                         | subjective effects                                                      | plasma nicotine                                 |
| (Wagener et al., 2017)    | directed e-cig puffing and ad-lib session | e-cig users used e-cig for 3 months, smokers used cig for 3 months     | 30 | 33.8(10.9)  | own G2, G3 e-cig device                                                                                   | preferred nicotine concentration                       | preferred flavor                                | subjective effects                                                      | plasma nicotine                                 |
| (Maloney et al., 2019)    | directed e-cig puffing and ad-lib session | smoked $\geq 10$ CPD for at least a year                               | 24 | 30.9 (9.5)  | nicotine inhaler, eGo 3.3 V, 1000 mAh e-cig battery with a 1.5 $\Omega$ , dual-coil, 510-style cartomizer | nicotine inhaler 10mg, 36mg/ml e-liquid                | preferred flavor tobacco or menthol             | multiple-choice procedure, subjective effects                           | plasma nicotine                                 |
| (Antoniwicz et al., 2019) | directed e-cig puffing session            | occasional cig users (max ten cigarettes/month)                        | 15 | 26 (3)      | variable mod e-cig (32 W, 0.20 $\Omega$ ).                                                                | 0,19mg/ml                                              | n/a                                             | BP, HR, arterial stiffness, dynamic spirometry and impulse oscillometry | n/a                                             |
| (Hiler et al., 2019)      | directed e-cig puffing and ad-lib session | smoke $<5$ CPD, use $\geq 1$ mL e-cig liquid daily for $\geq 3$ months | 32 | 25.6(7.1)   | 4.5-V Kanger SUBOX e-cig                                                                                  | 3, 8mg/ml                                              | Honeydew Pear                                   | HR, subjective effects, puff topography, and e-liquid consumption       | plasma nicotine                                 |
| (Yingst et al., 2019b)    | directed e-cig puffing session            | pod-based ENDS users                                                   | 6  | 37.8 (15.8) | own pod-based e-cig                                                                                       | 59mg/mL                                                | Users' own                                      | subjective effects                                                      | Serum nicotine, cotinine, and 3-hydroxycotinine |



## Human Table

|                            |                                           |                                                                                          |    |             |                                                                                    |                                                                           |                |                                                                                                                  |                          |
|----------------------------|-------------------------------------------|------------------------------------------------------------------------------------------|----|-------------|------------------------------------------------------------------------------------|---------------------------------------------------------------------------|----------------|------------------------------------------------------------------------------------------------------------------|--------------------------|
| (St. Helen et al., 2019)   | directed e-cig puffing session            | smoked $\geq 5$ CPD past month, use same e-cig device at least 15/30 past days           | 36 | 35.4 (11.7) | Users' own e-cig                                                                   | Users' own                                                                | Users' own     | subjective effects                                                                                               | plasma nicotine          |
| (Harvanko et al., 2019)    | Cig and e-cig ad-lib session              | smoked $\geq 5$ CPD past month, use same e-cig device at least 15/30 past days           | 36 | 35.4 (11.7) | own e-cig                                                                          | Users' own e-liquid and cig                                               | Users' own     | subjective effects                                                                                               | plasma nicotine/cotinine |
| (Spindle et al., 2017)     | directed e-cig puffing and ad-lib session | smoke $< 5$ CPD, use $\geq 1$ mL e-cig liquid daily for $\geq 3$ months                  | 29 | 29.6 (7.7)  | preferred e-cig battery                                                            | Users' own                                                                | n/a            | HR, subjective effects                                                                                           | plasma nicotine          |
| (Perry et al., 2019)       | directed puffing session                  | daily smokers                                                                            | 26 | 32.7 (11.5) | nicotine inhaler                                                                   | 10mg/4 mg deliverable                                                     | citrus or mint | MRI Resting state functional connectivity between insula, dorsal anterior cingulate cortex and nucleus accumbens | n/a                      |
| (Teichert et al., 2018)    | directed puffing session                  | smoked cigs for $\geq 3$ years                                                           | 14 | 39.8(13.8)  | Nicotine inhaler, P3L system                                                       | P3L(50, 80, and 150 $\mu\text{g}/\text{puff}$ ), Nicotine Inhaler (15 mg) | n/a            | subjective effects, tolerability                                                                                 | plasma nicotine          |
| (De La Garza et al., 2019) | directed e-cig puffing session            | smoke $\geq 10$ CPD for a year                                                           | 15 | 50.6 (7.6)  | eGo e-cig devices (3.3V battery and 1.5 $\Omega$ dual coil cartomizer)             | 0, 18, 36mg/ml in e-liquids                                               | tobacco        | subjective effects                                                                                               | n/a                      |
| (Baldassari et al., 2018)  | directed e-cig puffing session            | daily e-cig use for at least 1 month; cig smokers-or smoked $> 10$ CPD for the past year | 7  | 26 (4)      | Go e-cig devices (3.3V battery and 1.5 $\Omega$ dual coil cartomizer)              | 0, 8, and 36 mg/ml nicotine                                               | tobacco        | PET scan, $\beta 2^*$ -nAChRs receptor occupancy                                                                 | plasma nicotine          |
| (Breland et al., 2019)     | directed e-cig puffing session            | smoke $< 5$ CPD, use $\geq 1$ mL e-liquid daily for $\geq 3$ months                      | 24 | 28.6(7.4)   | user own e-cig, an eGo e-cig, nicotine inhaler                                     | used own                                                                  | used own       | multiple-choice procedure, subjective effects                                                                    | plasma nicotine          |
| (Smith et al., 2019)       | directed e-cig puffing session            | smoked $\geq 5$ non-menthol CPD past year, $< 5$ e-cig use                               | 30 | 43.7 (12.4) | ego e-cig-T 1100 mAh battery, cartomizers (510 Smoketech, 1.5- $\Omega$ dual coil) | 18mg/ml,                                                                  | tobacco        | subjective effects, Reinforcement value                                                                          | n/a                      |

## Human Table

|                               |                                           |                                                                               |    |              |                                                                                                               |                            |                                        |                                                                                          |                 |
|-------------------------------|-------------------------------------------|-------------------------------------------------------------------------------|----|--------------|---------------------------------------------------------------------------------------------------------------|----------------------------|----------------------------------------|------------------------------------------------------------------------------------------|-----------------|
| (Krishnan-Sarin et al., 2017) | directed e-cig puffing and ad-lib session | use e-cig 10/past 30 with nicotine                                            | 60 | 18.82 (0.77) | V2 Cigs (e-cig)                                                                                               | 0 mg/ml, 6 mg/ml, 12 mg/ml | Menthol: 0%, 0.5%, 3.5%                | subjective effects                                                                       | saliva nicotine |
| (Cobb et al., 2019)           | directed e-cig puffing session            | smoked $\geq$ 5 CPD past 3 months                                             | 20 | 19.9 (1.1)   | e-cig device (eGo 3.3–4.1 V, 1100 mAh battery and a 1.5- $\Omega$ dual-coil, 510-style cartomizer (SmokTech)) | 0, 36mg/ml                 | tobacco/menthol, tropical fruit, cream | HR, BP, subjective effects                                                               | n/a             |
| (O'Connell et al., 2019)      | directed e-cig puffing session            | smoked $\geq$ 10 CPD at least one year                                        | 15 | 42.3 (12.41) | Myblu pod system, blu PRO open system e-cig                                                                   | 25mg, 16mg, 40mg, 48mg     | tobacco                                | subjective effects                                                                       | plasma nicotine |
| (Yingst et al., 2019a)        | Directed e-cig puffing session            | use e-cig for at least 30 days in life, use e-cig for 20/28 past days         | 14 | 34.3 (10.8)  | User own e-cig (first-generation or advanced)                                                                 | Used own                   | Used own                               | Subjective effects                                                                       | Serum nicotine  |
| (Franzen et al., 2018)        | Directed e-cig puffing session            | cig smokers                                                                   | 15 | 22.9 (3.5)   | e-cig (eGO-T CE4 vaporizer 3.3 V, 1.5 $\Omega$ , 7.26 W)                                                      | 0, 24 mg/mL                | tobacco                                | arterial stiffness, blood pressure                                                       | n/a             |
| (Hajek et al., 2017)          | Ad-lib session                            | Dual users (currently smoking and vaping)                                     | 11 | 34.1 (12.0)  | first generation, second generation and third generation e-cigs                                               | 16–48mg/ml                 | tobacco                                | Subjective effects                                                                       | Plasma nicotine |
| (Chaumont et al., 2018)       | Directed e-cig puffing session            | occasional tobacco smokers                                                    | 25 | 23 (0.4)     | e-cig [60 W (0.4 $\Omega$ dual coils)]                                                                        | 0.3mg/ml                   | n/a                                    | microcirculatory function, arterial stiffness, hemodynamic parameters, oxidative stress. |                 |
| (Rüther et al., 2018)         | Directed e-cig puffing session            | e-cig users: use e-cig over 3 months. Cig user: use cigs over 3 years         | 20 | 28.5 (8.9)   | disposable cigalikes, a tank model e-cigs, cig                                                                | ~18mg/ml                   | tank model=strawberry/mint             | subjective effects, heart rate                                                           | n/a             |
| (Farsalinos et al., 2018)     | Ad-libitum                                | former daily smokers who used nicotine-containing e-cigs daily for at least 1 | 21 | 31(8)        | e-cig: battery (EVIC Supreme, Joyetech) 2600 mAh, 30 W                                                        | Used own                   | Used own                               | Puff topography, subjective effects.                                                     | Plasma nicotine |

## Human Table

|                         |                       |                                                       |    |             |                                                                                       |                   |                |                                                                 |                |
|-------------------------|-----------------------|-------------------------------------------------------|----|-------------|---------------------------------------------------------------------------------------|-------------------|----------------|-----------------------------------------------------------------|----------------|
|                         |                       | month                                                 |    |             | atomizer                                                                              |                   |                |                                                                 |                |
| (Van Heel et al., 2017) | Ad-lib session        | Smoke 10 CPD in past 3 years, no vaping experience    | 81 | 29.8(13.2)  | White Cloud disposable e-cig                                                          | 0% ,3.6% nicotine | Apple, tobacco | Subjective effects                                              | n/a            |
| (Hobkirk et al., 2018)  | Directed puffing bout | used e-cig at least 20/28 last days                   | 9  | 35.1(12.3)  | Used own e-cig                                                                        | Used own          | Used own       | Subjective effects. Resting state functional brain connectivity | n/a            |
| (Kerr et al., 2019)     | Directed puffing bout | habitual smoker at least 1 CPD                        | 20 | 31.6(10.5)  | e-cig: 1300mAh, tank and atomizer (SmokeMax; Groove Trading Ltd)                      | 18mg/ml           | tobacco        | Respiratory function, cardiovascular function                   | Blood nicotine |
| (Hajek et al., 2018)    | Ad-lib session        | Dual users (vaping and smoking), past smoking history | 15 | 36.3 (11.2) | 'cig-a-like', refillable products, variable voltage and own e-cig                     | 6-48mg/ml         | tobacco        | Subjective effects                                              | n/a            |
| (Adriaens et al., 2018) | Ad-lib session        | smoke for at least 3 years, 10 CPD                    | 30 | 22(3.1)     | e-cig: Eleaf iStick Power 5000 mAh battery, 8 W, with an Aspire Nautilus 2 tank, IQOS | 18 mg/mL          | Tobacco        | Subjective effects                                              | Blood nicotine |

Notes: e-cig=e-cigarette; CPD=cigarettes per day; HR=heart rate; BP=blood pressure; MRI=magnetic resonance imaging; PET=positron emission tomography; nAChRs=nicotinic acetylcholine receptors; ENDS=electronic nicotine delivery system; W=watts;  $\Omega$ =ohms; V=volts; mAh= milliamp Hour;

*Baseline assessments of nicotine/cotinine for inclusion criteria for studies were not included in table.*

## Citations

Adriaens, K., Gucht, D. Van, Baeyens, F., 2018. IQOS TM vs . e-Cigarette vs . Tobacco Cigarette : A Direct Comparison of Short-Term Effects after Overnight-Abstinence. *Int. J. Environ. Res. Public Health* 15, 1–20. <https://doi.org/10.3390/ijerph15122902>

Antoniewicz, L., Brynedal, A., Hedman, L., Lundbäck, M., Bosson, J.A., 2019. Acute Effects of Electronic Cigarette Inhalation on the Vasculature and the Conducting Airways. *Cardiovasc. Toxicol.* 19, 441–450. <https://doi.org/10.1007/s12012-019-09516-x>

## Human Table

- Baldassarri, S.R., Hillmer, A.T., Mikael, J., Ms, A., Jatlow, P., Nabulsi, N., Labaree, D., Malley, S.S.O., Eissenberg, T., Krishnan-sarin, S., Esterlis, I., 2018. Use of Electronic Cigarettes Leads to Significant Beta2-Nicotinic Acetylcholine Receptor Occupancy : Evidence From a PET Imaging Study. *Nicotine Tob. Res.* 20, 425–433. <https://doi.org/10.1093/ntr/ntx091>
- Breland, A., Maloney, S.F., Soule, E.K., Ramôa, C., Barnes, A., Lipato, T., Eissenberg, T., Breland, A., Maloney, S.F., Soule, E.K., Ramôa, C., Barnes, A., Lipato, T., Eissenberg, T., 2019. Abuse Liability of Electronic Cigarettes in Men Who Are Experienced Electronic Cigarette Users. *Exp Clin Psychopharmacol.*
- Caponnetto, P., Maglia, M., Prosperini, G., Busà, B., Polosa, R., 2018. Carbon monoxide levels after inhalation from new generation heated tobacco products. *Respir. Res.* 19, 1–4.
- Chaumont, M., Becker, B. De, Zaher, W., Culié, A., Deprez, G., Delporte, C., Debbas, N., Boudjeltia, K.Z., Borne, P. Van De, 2018. Differential Effects of E-Cigarette on Microvascular Endothelial Function , Arterial Stiffness and Oxidative Stress : A Randomized Crossover Trial. *Sci. Rep.* 1–9. <https://doi.org/10.1038/s41598-018-28723-0>
- Cobb, C.O., Lopez, A.A., Soule, E.K., Yen, M., Rumsey, H., Lester Scholtes, R., Rudy, A.K., Lipato, T., Guy, M., Eissenberg, T., 2019. Influence of electronic cigarette liquid flavors and nicotine concentration on subjective measures of abuse liability in young adult cigarette smokers. *Drug Alcohol Depend.* 203, 27–34. <https://doi.org/10.1016/j.drugalcdep.2019.05.024>
- De La Garza, R., Shuman, S.L., Yammine, L., Yoon, J.H., Salas, R., Holst, M., 2019. A Pilot Study of E - Cigarette Naïve Cigarette Smokers and the Effects on Craving After Acute Exposure to E - Cigarettes in the Laboratory. *Am. J. Addict.* 28, 361–366. <https://doi.org/10.1111/ajad.12895>
- Devito, E.E., Jensen, K.P., O'Malley, S.S., Gueorguieva, R., Krishnan-sarin, S., Valentine, G., Jatlow, P.I., Sofuoglu, M., 2019. Modulation of “ Protective ” Nicotine Perception and Use Profile by Flavorants : Preliminary Findings in E-cigarettes. *Nicotine Tob. Res.* 1–11. <https://doi.org/10.1093/ntr/ntz057>
- Farsalinos, K., Poulas, K., Voudris, V., 2018. Changes in Puffing Topography and Nicotine Consumption Depending on the Power Setting of Electronic Cigarettes. *Nicotine Tob. Res.* 20, 993–997. <https://doi.org/10.1093/ntr/ntx219>
- Franzen, K.F., Willig, J., Talavera, S.C., Meusel, M., Sayk, F., Reppel, M., Dalhoff, K., Mortensen, K., Droemann, D., 2018. E-cigarettes and cigarettes worsen peripheral and central hemodynamics as well as arterial stiffness : A randomized , double-blinded pilot study. *Vasc. Med.* 23, 419–425. <https://doi.org/10.1177/1358863X18779694>
- Hajek, P., Przulj, D., Phillips-Waller, A., Anderson, R., McRobbie, H., 2018. Initial ratings of different types of e-cigarettes and relationships between product appeal and nicotine delivery. *Psychopharmacology (Berl)*. 235, 1083–1092.
- Hajek, P., Przulj, D., Phillips, A., Anderson, R., McRobbie, H., 2017. Nicotine delivery to users from cigarettes and from different types of e-cigarettes. *Psychopharmacology (Berl)*. 234, 773–779. <https://doi.org/10.1007/s00213-016-4512-6>
- Harvanko, A.M., St.Helen, G., Nardone, N., Addo, N., Benowitz, N.L., 2019. Twenty-four Hour Subjective and Pharmacological Effects of Ad Libitum Electronic and combustible cigarette use among dual users. *Addiction*. <https://doi.org/10.1111/add.14931>

## Human Table

- Hiler, M., Breland, A., Spindle, T., Maloney, S., Lipato, T., Karaoghlanian, N., Shihadeh, A., Lopez, A., Ramôa, C., Eissenberg, T., 2017. Electronic cigarette user plasma nicotine concentration, puff topography, heart rate, and subjective effects: Influence of liquid nicotine concentration and user experience. *Exp. Clin. Psychopharmacol.* 25, 380–392. <https://doi.org/10.1037/pha0000140>
- Hiler, M., Karaoghlanian, N., Talih, S., Maloney, S., Breland, A., Shihadeh, A., Eissenberg, T., 2019. Effects of Electronic Cigarette Heating Coil Resistance and Liquid Nicotine Concentration on User Nicotine Delivery, Heart Rate, Subjective Effects, Puff Topography and Liquid Consumption. *Exp. Clin. Psychopharmacol.*
- Hobkirk, A.L., Nichols, T.T., Foulds, J., Yingst, J.M., Veldheer, S., Hrabovsky, S., Richie, J., Eissenberg, T., Wilson, S.J., 2018. Changes in resting state functional brain connectivity and withdrawal symptoms are associated with acute electronic cigarette use. *Brain Res Bull* 138, 56–63. <https://doi.org/10.1016/j.brainresbull.2017.05.010> Changes
- Kerr, D.M.I., Brooksbank, K.J.M., Taylor, R.G., Pinel, K., Rios, F.J., Touyz, R.M., Christian Delles, 2019. Acute effects of electronic and tobacco cigarettes on vascular and respiratory function in healthy volunteers : a cross-over study. *J. Hypertens.* 37, 154–166. <https://doi.org/10.1097/HJH.0000000000001890>
- Krishnan-Sarin, S., Green, B.G., Kong, G., Cavallo, D.A., Jatlow, P., Gueorguieva, R., Buta, E., O'Malley, S.S., 2017. Studying the interactive effects of menthol and nicotine among youth: An examination using e-cigarettes. *Drug Alcohol Depend.* 180, 193–199. <https://doi.org/10.1016/j.drugalcdep.2017.07.044>
- Leventhal, A.M., Goldenson, N.I., Barrington-Trimis, J.L., Pang, R.D., Kirkpatrick, M.G., 2019. Effects of non-tobacco flavors and nicotine on e-cigarette product appeal among young adult never, former and current smokers. *Drug Alcohol Depend.* <https://doi.org/10.1016/j.drugalcdep.2019.05.020>
- Maloney, S.F., Breland, A., Soule, E.K., Hiler, M., Ramôa, C., Lipato, T., Eissenberg, T., 2019. Abuse Liability Assessment of an Electronic Cigarette in Combustible Cigarette Smokers. *Exp Clin Psychopharmacol* 27, 443–454.
- O'Connell, G., Pritchard, J.D., Prue, C., Thompson, J., Verron, T., Graff, D., Walele, T., 2019. A randomised, open-label, cross-over clinical study to evaluate the pharmacokinetic profiles of cigarettes and e-cigarettes with nicotine salt formulations in US adult smokers. *Intern. Emerg. Med.* <https://doi.org/10.1007/s11739-019-02025-3>
- Perry, R.N., Schlagintweit, H.E., Darredeau, C., Helmick, C., Newman, A.J., Good, K.P., Barrett, S.P., 2019. The impacts of actual and perceived nicotine administration on insula functional connectivity with the anterior cingulate cortex and nucleus accumbens. *Psychopharmacology (Berl)*. 33, 1600–1609. <https://doi.org/10.1177/0269881119872205>
- Pullicin, A.J., Kim, H., Brinkman, M.C., Buehler, S.S., Clark, P.I., Lim, J., 2019. Impacts of Nicotine and Flavoring on the Sensory Perception of E-Cigarette Aerosol. *Nicotine Tob. Res.* 1–8. <https://doi.org/10.1093/ntr/ntz058>
- Rüther, T., Hagedorn, D., Schiela, K., Schettgen, T., Osiander-fuchs, H., Schober, W., 2018. Nicotine delivery efficiency of first- and second-generation e-cigarettes and its impact on relief of craving during the acute phase of use. *Int. J. Hyg. Environ. Health* 221, 191–198. <https://doi.org/10.1016/j.ijheh.2017.10.012>

## Human Table

- Smith, T.T., Heckman, B.W., Wahlquist, A.E., Cummings, K.M., Carpenter, M.J., 2019. The Impact of E-liquid Propylene Glycol and Vegetable Glycerin Ratio on Ratings of Subjective Effects , Reinforcement Value , and Use in Current Smokers. *Nicotine Tob. Res.* 1–7. <https://doi.org/10.1093/ntr/ntz130>
- Spindle, T.R., Hiler, M.M., Breland, A.B., Karaoghanian, N. V., Shihadeh, A.L., Eissenberg, T., 2017. The Influence of a Mouthpiece-Based Topography Measurement Device on Electronic Cigarette User's Plasma Nicotine Concentration, Heart Rate, and Subjective Effects Under Directed and Ad Libitum Use Conditions. *Nicotine Tob. Res.* 19, 469–476. <https://doi.org/10.1093/ntr/ntw174>
- Spindle, T.R., Talih, S., Hiler, M.M., Karaoghanian, N., Halquist, M.S., Breland, A.B., Shihadeh, A., Eissenberg, T., 2018. Effects of electronic cigarette liquid solvents propylene glycol and vegetable glycerin on user nicotine delivery, heart rate, subjective effects, and puff topography. *Drug Alcohol Depend.* 188, 193–199. <https://doi.org/10.1016/j.drugalcdep.2018.03.042>
- St. Helen, G., Nardone, N., Addo, N., Benowitz, N., 2019. Differences in nicotine intake and effects from electronic and combustible cigarettes among dual users. *Addiction.* <https://doi.org/10.1111/add.14884>
- St.Helen, G., Dempsey, D.A., Havel, C.M., Jacob, P., Benowitz, N.L., 2017. Impact of e-liquid flavors on nicotine intake and pharmacology of e-cigarettes. *Drug Alcohol Depend.* 178, 391–398. <https://doi.org/10.1016/j.drugalcdep.2017.05.042>
- Staudt, M.R., Salit, J., Kaner, R.J., Hollmann, C., Crystal, R.G., 2018. Altered lung biology of healthy never smokers following acute inhalation of e-cigarettes. *Respir. Res.* 19, 1–10.
- Teichert, A., Brossard, P., Medlin, L.F., Sandalic, L., Franzon, M., Wynne, C., Mbchb, M.L., Lüdicke, F., 2018. Evaluation of Nicotine Pharmacokinetics and Subjective Effects following Use of a Novel Nicotine Delivery System. *Nicotine Tob. Res.* 20, 458–465. <https://doi.org/10.1093/ntr/ntx093>
- Van Heel, M., Van Gucht, D., Vanbrabant, K., Baeyens, F., 2017. The Importance of Conditioned Stimuli in Cigarette and E-Cigarette Craving Reduction by E-Cigarettes. *Int. J. Environ. Res. Public Health* 14, 1–18. <https://doi.org/10.3390/ijerph14020193>
- Voos, N., Kaiser, L., Mahoney, M.C., Bradizza, C.M., Kozlowski, L.T., Benowitz, N.L., O'Connor, R.J., Goniewicz, M.L., 2019a. Randomized Within-Subject Trial To Evaluate Smokers' Initial Perceptions, Subjective Effects, and Nicotine Delivery Across Six Vaporized Nicotine Products, *Addiction.* <https://doi.org/10.1111/add.14602>
- Voos, N., Smith, D., Kaiser, L., Mahoney, M.C., Bradizza, C.M., Kozlowski, L.T., Benowitz, N.L., Connor, R.J.O., Goniewicz, M.L., 2019b. Effect of e-cigarette flavors on nicotine delivery and puffing topography : results from a randomized clinical trial of daily smokers. *Psychopharmacology (Berl).*
- Wagener, T.L., Floyd, E.L., Stepanov, I., Driskill, L.M., Frank, S.G., Meier, E., Leavens, E.L., Tackett, A.P., Molina, N., Queimado, L., 2017. Have combustible cigarettes met their match? The nicotine delivery profiles and harmful constituent exposures of second- generation and third-generation electronic cigarette users. *Tob Control* 26, e23–e28. <https://doi.org/10.1136/tobaccocontrol-2016-053041>.Have
- Yingst, J.M., Foulds, J., Veldheer, S., Hrabovsky, S., Trushin, N., Eissenberg, T.T., Williams, J., Richie, J.P., Nichols, T.T., Wilson, S.J., Hobkirk, A.L., 2019a. Nicotine absorption during electronic cigarette use among regular users. *PLoS One* 14, 1–15.

Human Table

Yingst, J.M., Hrabovsky, S., Hobkirk, A., Trushin, N., Jr, J.P.R., Foulds, J., 2019b. Nicotine Absorption Profile Among Regular Users of a Pod-Based Electronic Nicotine Delivery System. *JAMA Netw. Open* 2, 15–18. <https://doi.org/10.1001/jamanetworkopen.2019.15494>

Journal Pre-proof
